# Supplementary material for: Dithranol targets keratinocytes, their crosstalk with neutrophils and inhibits the IL-36 inflammatory loop in psoriasis
Source: eLife. 2020 Jun 2;9:e56991. doi: 10.7554/eLife.56991 (PMC7266641; doi:10.7554/eLife.56991)
Supplement: Figure 1—figure supplement 1—source data 1. [file elife-56991-fig1-figsupp1-data1.xlsx]

## Sheet: Tabelle1
Psoriasis area and severity index (PASI) and psoriasis severity index (PSI)
Patient ID	Baseline PASI	Day 6 PASI	End of treatment PASI	Follow-up PASI	Day 6 PASI reduction (%)	End of treatment PASI reduction (%)	Follow-up PASI reduction (%)	Baseline PSI	Day 6 PSI	End of treatment PSI	Follow-up PSI	Day 6 PSI reduction (%)	End of treatment PSI reduction (%)	Follow-up PSI reduction (%)
A1	31.5	21	12.9	26.4	33.3333	59.0476	16.1905	7	6	2	1	14.2857	71.4286	85.7143
A2	24.1	17.2	13.7		28.6307	43.1535		7	5	2	0	28.5714	71.4286	100
A3	12.8	10.1	3.3	4.5	21.0938	74.2188	64.8438	9	4	1	2	55.5556	88.8889	77.7778
A4	7	3.9	2.7	4.2	44.2857	61.4286	40	8	4	5	5	50	37.5	37.5
A5	39	21.8			44.1026			7	5	0	0	28.5714	100	100
A6	6	4	2	1.8	33.3333	66.6667	70	8	3	1	2	62.5	87.5	75
A7	6.6	5.5	2.6	2	16.6667	60.6061	69.697	6	3	4	1	50	33.3333	83.3333
A8	6.6	4.4	3.6	3.6	33.3333	45.4545	45.4545	4	1	2	1	75	50	75
A9	12.8	9.6	6.4	12.4	25	50	3.125	7	3	2	2	57.1429	71.4286	71.4286
A10	3.6	2.4	1.8	1.2	33.3333	50	66.6667	6	2	5	3	66.6667	16.6667	50
A11	15.7	10	6	7.8	36.3057	61.7834	50.3185	6	2	2	3	66.6667	66.6667	50
A12	19.1	12.8	7.7	6.4	32.9843	59.6859	66.4921	7	5	1	1	28.5714	85.7143	85.7143
A13	6.7	4.9	3.9	1.3	26.8657	41.791	80.597	7	2	2	1	71.4286	71.4286	85.7143
A14	8.2	4.8	2.9	2.1	41.4634	64.6341	74.3902	6	0	0	0	100	100	100
A15	4.2	2.4	1.4	0.8	42.8571	66.6667	80.9524	6	4	1	2	33.3333	83.3333	66.6667
Mean	13.5933	8.98667	5.06429	5.73077	32.9059	57.5098	56.056	6.73333	3.26667	2	1.6	52.5529	69.0212	76.2566
Standard deviation	10.2509	6.31441	3.79861	6.74735	7.99968	9.48403	23.257	1.12349	1.61107	1.50555	1.30639	21.9256	23.8576	18.2781
Min	3.6	2.4	1.4	0.8	16.6667	41.791	3.125	4	0	0	0	14.2857	16.6667	37.5
Max	39	21.8	13.7	26.4	44.2857	74.2188	80.9524	9	6	5	5	100	100	100
