# Supplementary material for: Dithranol targets keratinocytes, their crosstalk with neutrophils and inhibits the IL-36 inflammatory loop in psoriasis
Source: eLife. 2020 Jun 2;9:e56991. doi: 10.7554/eLife.56991 (PMC7266641; doi:10.7554/eLife.56991)
Supplement: Figure 2—source data 1. [file elife-56991-fig2-data1.xlsx]

## Sheet: Epidermal thickness
Epidermal thickness (µm)
NL	Day 0	Day 6	Week 2-3	Follow-up	HC
82.59	387.53	319.7	287.16	122.04	49.03
60.39	296.96	476.27	121.01		63.76
79.99	533.04	380.56	132.62	109.15	38.71
68.39	358.11	369.73	224.96	309.34	68.39
100.11	404.29	372.7			93.17
44.14	252.33	241.24	269.36	177.76	73.02
57.82	219.56	256.71	174.41	83.6
98.57	247.16	186.54	222.14	122.3	55.22
113.76	320.44	423.38	332.57	248.47	55.22
108.61	598.81	321.21	460.97	240.98	44.13
67.09	293.61	566.57	242.26	135.97	51.86
119.21	310.63	250.26	174.41	145.52	53.17
71.48	211.57	175.2	184.74	68.63
91.94	370.49
86.7	361.97	345.21	275.8	172.09

## Sheet: Infiltrate score 
Infiltrate score
NL	Day 0	Day 6	Week 2-3	Follow-up	HC
1	2	2.5	2.5	1.5	1
1	2.5	2	2		1
1	3	2	2.5	1.5	1
1	2	2.5	3	2	1
2	2.5	2.5			2.5
1	2	3	2.5	2	1.5
1	3	2	2.5	1.5
1.5	2.5	2	3	2.5	1
1.5	2	2	2	1.5	1
1	3	2	2.5	2	1
1	3	3	3	2.5	1
1	3	3	2	1	1
0.5	3	2.5	2	1.5
1	2
1	3	3	2.5	2

## Sheet: Ki-67 area 
Ki-67 area (mm2)
Day 0	NL	Day 6	Week 2-3	Follow-up	HC
0.0205535	0.00204925	0.0216596	0.0230456	0.00446977	0.00111698
0.0221268	0.00424031	0.0205148	0.00249467		0.00264703
0.0293686	0.00075236	0.0235513	0.00375883	0.00107519	0.00139322
0.0190617	0.00119057	0.00746663	0.0194692	0.00666472	0.00234952
0.0166136		0.0143495			0.00154244
0.01526	0.00175914	0.0197087	0.0235944	0.00273948	0.00159014
0.00944247	0.00154392	0.0149837	0.0160046	0.00112623	0.0013886
0.0190815	0.00184345	0.0050302	0.0170213	0.00254441	0.00147643
0.0117802	0.00182589	0.0174231	0.00558897	0.00602256
0.0345772	0.00458034	0.0362881	0.0135724	0.0113902
0.0116182	0.00132093	0.0223091	0.01126	0.00410811
0.0182195	0.00236968	0.0230439	0.0111387	0.00209214
0.00712808	0.00122959	0.0063968	0.00203519	0.00176117
0.0284036	0.00138231
0.0214795	0.00237726	0.0156956	0.0109694	0.00575335

## Sheet: CK16
CK16 area/epidermal area
Day 0	NL	Day 6	Week 2-3	Follow-up	HC
0.719257	0.439947	0.738196	0.589281	0.505846	0.344881
0.713088	0.549316	0.623706	0.515638		0.421688
0.64049	0.350197	0.646798	0.499604	0.471323	0.406499
0.797852	0.556945	0.532809	0.526056	0.584491	0.417894
0.840884		0.731162			0.511487
0.628783	0.464591	0.547716	0.689025	0.541527	0.394704
0.585692	0.408594	0.472927	0.683787	0.493016	0.449223
0.54895	0.44838	0.658797	0.528275	0.530397	0.418626
0.597812	0.548905	0.763543	0.556082	0.543079	0.483781
0.698525	0.453161	0.595296	0.523172	0.477401	0.334808
0.618251	0.391625	0.533002	0.607167	0.43285	0.432797
0.620218	0.361469	0.571696	0.576797	0.456605
0.723845	0.41452	0.57981	0.533336	0.390179
0.598462	0.410143
0.672343	0.416268	0.442	0.405781	0.376019

## Sheet: MPO
MPO (Epidermis) mean cell count
NL	Day 0	Day 6	Week 2-3	Follow-up	HC
1.33333	8.25	3	0.333333	0.666667	0
0.666667	1.33333	9.33333	1		0
0	36.6667	2.66667	0	0	0
0	3	0.333333	0	0.333333	0
0.5	31.3333	0.666667			0
0	0.333333	1	0.666667	2	0
0	0.333333	0	0.666667	0
0	0	0	0	1	0
0	0	11.3333	1.33333	0	0
0	6	2	0.333333	0	0
0	1	0	0.333333	0	0
0	1.33333	0	0	0	0
0	2.66667	0	0	0
0.333333	0
0	2	0	0.333333	0
MPO (dermis) mean cell count
NL	Day 0	Day 6	Week 2-3	Follow-up	HC
1.33333	52	14	3.33333	1.66667	1.33333
1	9.33333	1.66667	3		0
6	37.6667	7	8	0.333333	1.66667
0.333333	21	2.66667	1.66667	0	0
12	57	11.6667			0.666667
0.333333	8	26	10.3333	1.66667	0
0.333333	2	0	16.6667	0
0	10	0.666667	3.66667	2.33333	1
0	5.66667	20	9.66667	0	0.666667
0.666667	4	0.333333	1	0	0
0	12	40.3333	19.3333	1	0
0.666667	18.3333	0.666667	1.33333	0	0
0	39	5.66667	0	0
0	2
0	2	1	1	0

## Sheet: CD1a
CD1a (Epidermis) mean cell count
HC	NL	Day 0	Day 6	Week 2-3	Follow-up
25.6	14.3	7.6	5.8	8	17.4
18.8	11.7	10.4	16.2	27.6
16.2	20.5	12.2	13.2	15.6	14.8
10.8	14.2	16.4	24.6	12.2	9.6
23.3	25	17.4	14.6
23.2	14	10.8	10.6	10.4	18.4
	11.6	13.6	20.4	11.8	19.8
18.6	16.2	10.4	21.8	13.6	28.4
13	13	14	14	20.6	13.6
19.6	9.2	8.4	12.6	12.8	13.4
14.3	15.2	16	13	23.4	14
18.2	15.8	16	19.6	25	28
		7.8	13.2	21.8	24.4
	15.4	23.2
	11.8	18.2	12.8	12.8	27.2
CD3 (dermis) mean cell count
HC	NL	Day 0	Day 6	Week 2-3	Follow-up
1.5	0.75	6.8	7.6	5.4	3.4
2.8	2.3	8.5	8.8	6.8
8.6	5	7.2	2.6	5.8	3.4
1.6	2.4	6.4	6	6	6.4
1.3	28.7	6.6	11.6
3.2	6	9.4	10.2	9.8	11.4
	4.8	15	4.8	15.2	4
2.5	4.4	5.4	3	4.8	5
4.3	4.4	13	5.4	7	10.8
4.6	2	3		4.4	2.4
5	3	9	5.4	10.2	6.2
15.6	0.8	6.2	9.4	8.8	4.2
		7.4	12.2	13.2	12
	8.6	13
	2.2	7.8	6.4	8.2	15

## Sheet: CD3
CD3 (Epidermis) mean cell count
NL	Day 0	Day 6	Week 2-3	Follow-up	HC
0	27.8	24	36.2	1.6	0
2	26	30.4	14.6		1.6
2.3	55.8	71.4	10.8	2.8	1.2
2.4	38.2	23	19	17.6	0
25	24	36			1.8
0.8	21	24.2	20.6	8.2	0.8
1.6	20.8	9.2	16	4.8
0.6	11	17.75	21.8	11.8	0
3.2	34	31.2	19	3.6	0.4
0.4	16	19.8	17.8	16	0.8
0	55	22	39.6	5.6	0.2
0.6	33.4	35.4	18.4	1.8	1.8
	10.4	5	9.4	1.6
1.2	22.8
0	23.8	24.4	12.4	7.4
CD3 (dermis) mean cell count
NL	Day 0	Day 6	Week 2-3	Follow-up	HC
11.5	74.4	84.4	74.2	14.4	24
26.3	94.4	127.6	60.2		30
27	145.8	94.4	79.4	29.6	11.8
10.8	78.6	92	108.2	63.6	12.8
44	92.6	87.8			82.4
14.6	180.6	252.2	234.6	87.6	39.2
32.2	202.6	65	160.2	44.8
24	118.2	107.4	139.25	79	23.8
18	166.6	76	73.2	60.4	18.5
10.8	121.4	124.2	102.4	78	16
14.6	112.5	124.2	146	76	23.6
26.7	135.6	151.4	130.8	29.2	24.2
	118.4	88	95.4	29.4
52.8	137.2
7.6	160	151	183.2	126.6

## Sheet: CD4
CD4 (Epidermis) mean cell count
NL	Day 0	Day 6	Week 2-3	Follow-up	HC
0	25.4	18.8	42.6	3.6	1
0	1.7	27	15		1.33333
1.3	40	53.7	6.3	3	2.33333
2	43.3	25	18.7	27.7	1
11.5	27	23.7
1	21.7	19.7	16.7	6	3.66667
1.7	29	18	16	6.3
3	9.7	12.7	32.3	8	1
11.7	13	23.3	27	10	0.666667
0	26	20.3	17.7	12.7	0
1.3	25	20.7	28.7	6.7	1.33333
1.3	46	21.3	3	2.3	1.66667
	12.7	13.3	9.3	2.3
0	14.3
1	26.7	20	16	1.3
CD4 (dermis) mean cell count
NL	Day 0	Day 6	Week 2-3	Follow-up	HC
16	140	176.7	179.3	79.3	29.3
62.5	140	138	97.7		69.7
27.3	182.3	136.3	95.3	57	48.3
21.7	133	127.7	164.7	133.7	51
158.5	124	187.7
32.3	183.3	244		128	93.7
42	200	94	148.7	87.7
39.7	152.7	111.3	166.3	101.3	44
48	159	165.7	144.3	67.7	34.7
33.3	162	167	149.7	105	55.3
51.3	137	183	202.3	157	59.7
52	181	224.7	165	58.3	29
	163	107.7	115.3	58.7
68.3	183
27.3	236.3	247	219.7	185.7

## Sheet: FoxP3
FoxP3 (Epidermis) mean cell count
NL	Day 0	Day 6	Week 2-3	Follow-up	HC
0.75	5.8	2.4	6.4	0	0
	15.5	22.2	6.8		0.4
0.67	15.75	26.25	2.6	0.4	1.2
0	11.2	4.4	2	2.8	0
	12.2	13.4			0
0.4	6.8	5.2	3.8	0.8	0.4
0.5	3.4	2	4.6	1
0	6.4	5	7.4	3	0.2
0.2	3.4	9.4	5	3.8	0
0	5.4	13	6.2	2.6	0.4
0	11.5	6	10.4	1	0.2
0	11.8	16.4	2	0.4
0	3.6	2.4	3.6	1.2
0.6	9.8
0	21.5	6	3.2	2.4
FoxP3 (dermis) mean cell count
NL	Day 0	Day 6	Week 2-3	Follow-up	HC
5.5	93.3	58.2	80.8	22.6	5.7
	42.7	93.6	33.4		7.6
3.3	88.25	67	46.8	11.2	17
3.6	58.8	45.8	45.4	46.2	9.4
	56.8	64.2			19.8
6	116.6	138.3	107.8	35.6	7.6
3.4	50.2	25	67.6	9.8
4	50.8	32.6	64.75	25.2	6.4
7.4	28.6	38.75	52	26.4	2.5
2.4	35	78	39.2	26.2	5.4
1.8	55	56.4	104.8	37.2	7.4
4.8	49	89.2	55	16.6
2.2	48.6	29.4	42.4	15
10.4	44
5	79.25	55.2	90	43.75

## Sheet: CD8
CD8 (Epidermis) mean cell count
NL	Day 0	Day 6	Week 2-3	Follow-up	HC
0.3	57.3	34	47.7	7.3	0.7
0.5	33	46.3	11.7		2
0	55.7	48.7	4.3	5	0.3
1.7	66.7	38.3	20.7	31	0
5.7	18.3	23.7			2.7
1	22	19.3	21	2.3	1.3
1.7	25	9.3	11.7	3.7
0.7	8.7	13	18	12.3	0
2.7	33.3	27.7	12.7	5.3	0
0	46	41.7	38.3	16.3	0
0	43	28	25	10	1
2.3	33.3	26	8.7	1.7
0	12.6667	1.33333	2.33333	0.333333
0.333333	17.3333
0	9.33333	8	2.33333	1.33333
CD8 (dermis) mean cell count
NL	Day 0	Day 6	Week 2-3	Follow-up	HC
8.7	81	67.7	51	47.7	7
37.5	77.3	109	69.7		42.3
26	89.3	67.7	102.3	36	5
16	78.7	126	128	77.7	6.3
57.7	64.7	45.7			48.7
10	83.3	180	134	70	49.7
42.3	87.7	39.3	84.3	43.3
11.7	74	45.3	87.3	59.3	6.7
29.7	76	76	64	27.3	12
4.7	33.7	105.5	34.3	39.7	14.3
11.7	57.5	104.7	103.3	67.3	21.3
25	70.3	108.3	84	34.7
14.5	46	27.6667	32	15.6667
9.66667	32.3333
2.33333	65.6667	49	34.6667	60.6667
