# Supplementary material for: Dithranol targets keratinocytes, their crosstalk with neutrophils and inhibits the IL-36 inflammatory loop in psoriasis
Source: eLife. 2020 Jun 2;9:e56991. doi: 10.7554/eLife.56991 (PMC7266641; doi:10.7554/eLife.56991)
Supplement: Figure 3—source data 1. [file elife-56991-fig3-data1.xlsx]

## Sheet: Macroscopic ear thickness
Macroscopic ear thickness (mm)
Dithranol			Controls
Day 1	Day 7		Day 1	Day 7
3.25	1.785		1	0.66
0.6	1.12		0.67	0.985
0.75	0.925		0.55	0.57
3.35	1.89		1.75	0.855
2.95	1.575		0.75	1.01
1.9	1.445		1.25	0.775
1.05	1.025		1.3	1.1
2.85	1.15		0.65	0.82
0.5	0.65		1.95	1.55
3.15	1.95		1.1	0.74
0.65	0.65		2.55	1.35

## Sheet: Epidermal thickness
Epidermal thickness (µm)
Dithranol	Controls
105.145	163.878
183.806	151.131
125.699	196.789
110.461	216.884
148.023	194.561
58.355	228.73
140.07	157.011
181.597	176.128
122.478	127.458
141.493	189.236
119.46
