# Supplementary material for: Dithranol targets keratinocytes, their crosstalk with neutrophils and inhibits the IL-36 inflammatory loop in psoriasis
Source: eLife. 2020 Jun 2;9:e56991. doi: 10.7554/eLife.56991 (PMC7266641; doi:10.7554/eLife.56991)
Supplement: Supplementary file 4. [file elife-56991-supp4.docx]

Supplementary File 4: qPCR Primer sequences and corresponding annealing temperatures.

|  |  |  |
| --- | --- | --- |
| **Primer ID** | **Sequence** | **Annealing Temperature (°C)** |
| Cxcl1 | Fw: ATCCAGAGCTTGAAGGTGTTG; | 60 |
| Rev: GTCTGTCTTCTTTCTCCGTTACTT |
| Cxcl5 | Fw: CTCAGTCATAGCCGCAACCGAGC; | 60 |
| Rev: CGCTTCTTTCCACTGCGAGTGC |
| Defb1 (Defensin beta 1) | Fw: CCAGCTGCCCATCTAATACC; | 60 |
| Rev: AATCCATCGCTCGTCCTTTA |
| Defb3 (Defensin beta 3) | Fw: TCTGACGAGTGTTGCCAATG; | 60 |
| Rev: ACAATCCAGTAAGTTGTTTGAGGA |
| Flg | Fw: GAAGGAACTTCTGGAAGGACAAC; | 60 |
| Rev: TCCATCAGTTCCACCATGCCTC |
| Il17 | Fw: GGACTCTCCA CCGCAATGA; | 60 |
| Rev: TCAGGCTCCCTCTTCAGGAC |
| Il1b | Fw: GAGTGTGGATCCCAAGCAAT; | 58 |
| Rev: TACCAGTTGGGGAACTCTGC |
| Il1f5 (IL36RN) | Fw: CTTACTCCTCTCCTTCCCTACT; | 60 |
| Rev: GGTCATCTTCTGTCAGCTATCC |
| Il22 | Fw: CAGCTCCTGTCACATCAGCGGT; | 60 |
| Rev: AGGTCCAGTTCCCCAATCGCCT |
| Ivl | Fw: AAACTTGGTGAGCCAGAATTACA; | 60 |
| Rev: CCTTTCCAGTTGTTTACCCTTCT |
| Krt16 | Fw: AGCAGGAGATCGCCACCTA; | 60 |
| Rev: AGTGCTGTGAGGAGGAGTGG |
| Lce3e | Fw: GCCCTGCTGACTTCTTCTATCCAG; | 63 |
| Rev: AGCTACCAGGGAATGAGGACTGTG |
| Lcn2 | Fw: CCCTGTATGGAAGAACCAAGGA; | 60 |
| Rev: CACACTCACCACCCATTCAGT |
| LL37 (Camp) | Fw: CTTCAAGGAACAGGGGGTG; | 60 |
| Rev: CCAAGGCAGGCCTACTACTC |
| Rpl13a | Fw: CACTCTGGAGGAGAAACGGAAGG; | 63 |
| Rev: GCAGGCATGAGGCAAACAGTC |
| S100A8 | Fw: AAATCACCATGCCCTCTACAAG; | 58 |
| Rev: CCCACTTTTATCACCATCGCAA |
| S100A9 | Fw: GGTGGAAGCACAGTTGGCA; | 58 |
| Rev: GTGTCCAGGTCCTCCATGATG |
| Serpbinb7 | Fw: CTTCTCTTCCCTGAGCATCTTC; | 60 |
| Rev: GTGAAGGCCGATTTCCATTTG |
| Serpinb13 | Fw: CCCAGTTCAACCTGGAAGATAG; | 60 |
| Rev: CCAGAGTAGATCAAGGGCAATAG |
| Serpinb3a | Fw: TCCTGTTGCCAGTGGAAATCA; | 60 |
| Rev: TCAAAGGCATCGACCATTCCC |
| Ubc | Fw: AGGTCAAACAGGAAGACAGACGTA; | 60 |
| Rev: TCACACCCAAGAACAAGCACA |
| Ywhaz | Fw: AACAGCTTTCGATGAAGCCAT; | 60 |
| Rev: TGGGTATCCGATGTCCACA |
|  |  |  |
